# Supplementary material for: Administration with Quinoa Protein Reduces the Blood Pressure in Spontaneously Hypertensive Rats and Modifies the Fecal Microbiota
Source: MDPI journal article supplement (doi:10.3390/nu13072446), 2021-07-17
Supplement: s1 [file s1]

Table S1 Identified peptides in digested samples

| Stomach contents at 0.5 h |                          |         |                                          |                   |
|---------------------------|--------------------------|---------|------------------------------------------|-------------------|
| No.                       | Sequence                 | Spectra | Protein (Unused Score $\geq 2.0$ )       | Protein Accession |
| 1                         | FTVSVKAGSNGFE            | 8       | 11S globulin seed storage protein 2-like | XP_021768838.1    |
| 2                         | ILSPGSEQDYDDER           | 6       | 11S globulin seed storage protein 2-like | XP_021768838.1    |
| 3                         | IQVVGNNGESVMDDRVNEG      | 3       | 11S globulin seed storage protein 2-like | XP_021768838.1    |
| 4                         | IQVVGNNGESVMDDRVNEGEM    | 4       | 11S globulin seed storage protein 2-like | XP_021768838.1    |
| 5                         | IRKMQQTENRGL             | 1       | 11S globulin seed storage protein 2-like | XP_021768838.1    |
| 6                         | PNTIYSPHWAVNSH           | 1       | 11S globulin seed storage protein 2-like | XP_021768838.1    |
| 7                         | PNTIYSPHWAVNSHSV         | 1       | 11S globulin seed storage protein 2-like | XP_021768838.1    |
| 8                         | PNTIYSPHWAVNSHSVV        | 2       | 11S globulin seed storage protein 2-like | XP_021768838.1    |
| 9                         | SSEIRGKINNIFR            | 4       | 11S globulin seed storage protein 2-like | XP_021768838.1    |
| 10                        | SSEIRGKINNIFRP           | 1       | 11S globulin seed storage protein 2-like | XP_021768838.1    |
| 11                        | SVEKGNMFPNTIYSPHWAVNSH   | 1       | 11S globulin seed storage protein 2-like | XP_021768838.1    |
| 12                        | SVEKGNMFPNTIYSPHWAVNSHS  | 1       | 11S globulin seed storage protein 2-like | XP_021768838.1    |
| 13                        | TRGDIIAIPPGAVH           | 13      | 11S globulin seed storage protein 2-like | XP_021768838.1    |
| 14                        | VIVNDLNNPSNQLDQTFR       | 3       | 11S globulin seed storage protein 2-like | XP_021768838.1    |
| 15                        | VIVNDLNNPSNQLDQTFRS      | 1       | 11S globulin seed storage protein 2-like | XP_021768838.1    |
| 16                        | VQQNSLSLPNFH             | 5       | 11S globulin seed storage protein 2-like | XP_021768838.1    |
| 17                        | YQISPSEAHQLKYNR          | 1       | 11S globulin seed storage protein 2-like | XP_021768838.1    |
| 18                        | HGGRLNIVNE               | 1       | 11S globulin seed storage protein 2-like | XP_021768838.1    |
| 19                        | INNIFRPFA                | 1       | 11S globulin seed storage protein 2-like | XP_021768838.1    |
| 20                        | SVEKGNMFPNTIYSPHW        | 1       | 11S globulin seed storage protein 2-like | XP_021768838.1    |
| 21                        | RILSPGSEQD               | 1       | 11S globulin seed storage protein 2-like | XP_021768838.1    |
| 22                        | PNTIYSPHW                | 2       | 11S globulin seed storage protein 2-like | XP_021768838.1    |
| 23                        | QNSLSLPNFHP              | 1       | 11S globulin seed storage protein 2-like | XP_021768838.1    |
| 24                        | HGGRLNIVNEHK             | 1       | 11S globulin seed storage protein 2-like | XP_021768838.1    |
| 25                        | SLSLPNFHPFPR             | 1       | 11S globulin seed storage protein 2-like | XP_021768838.1    |
| 26                        | VQQNSLSLPNFHP            | 1       | 11S globulin seed storage protein 2-like | XP_021768838.1    |
| 27                        | IRGKINNIFR               | 1       | 11S globulin seed storage protein 2-like | XP_021768838.1    |
| 28                        | GGRNIVNEHKLPILRH         | 1       | 11S globulin seed storage protein 2-like | XP_021768838.1    |
| 29                        | DTNNFQNQLDDNLR           | 5       | 13S globulin seed storage protein 2-like | XP_021752668.1    |
| 30                        | FQLGQSPFLPSGQSSPQH       | 1       | 13S globulin seed storage protein 2-like | XP_021752668.1    |
| 31                        | FQLGQSPFLPSGQSSPQHS      | 1       | 13S globulin seed storage protein 2-like | XP_021752668.1    |
| 32                        | GGQEEMGQNILSGFDK         | 1       | 13S globulin seed storage protein 2-like | XP_021752668.1    |
| 33                        | GLLLPHYNNAPSIS           | 1       | 13S globulin seed storage protein 2-like | XP_021752668.1    |
| 34                        | IANHEGELVFDDM            | 1       | 13S globulin seed storage protein 2-like | XP_021752668.1    |
| 35                        | LLTNDNAMSSPLAGR          | 12      | 13S globulin seed storage protein 2-like | XP_021752668.1    |
| 36                        | LLTNDNAMSSPLAGRIS        | 14      | 13S globulin seed storage protein 2-like | XP_021752668.1    |
| 37                        | LSVNIDNPERAD             | 1       | 13S globulin seed storage protein 2-like | XP_021752668.1    |
| 38                        | LTNDNAMSSPLAGR           | 6       | 13S globulin seed storage protein 2-like | XP_021752668.1    |
| 39                        | LTNDNAMSSPLAGRIS         | 14      | 13S globulin seed storage protein 2-like | XP_021752668.1    |
| 40                        | NAMSSPLAGRIS             | 5       | 13S globulin seed storage protein 2-like | XP_021752668.1    |
| 41                        | QSPFLPSGQSSPQHSLR        | 1       | 13S globulin seed storage protein 2-like | XP_021752668.1    |
| 42                        | QSPFLPSGQSSPQHSLRLQ      | 1       | 13S globulin seed storage protein 2-like | XP_021752668.1    |
| 43                        | VALLTNDNAMSSPLAGR        | 4       | 13S globulin seed storage protein 2-like | XP_021752668.1    |
| 44                        | VALLTNDNAMSSPLAGRIS      | 1       | 13S globulin seed storage protein 2-like | XP_021752668.1    |
| 45                        | YDTNNFQNQLDDNLR          | 14      | 13S globulin seed storage protein 2-like | XP_021752668.1    |
| 46                        | YDTNNFQNQLDDNLR          | 8       | 13S globulin seed storage protein 2-like | XP_021752668.1    |
| 47                        | MLIPEWDQEEQR             | 1       | 13S globulin seed storage protein 2-like | XP_021752668.1    |
| 48                        | QLGFQLGQSPFLPSGQSSPQHSLR | 1       | 13S globulin seed storage protein 2-like | XP_021752668.1    |
| 49                        | LSVNIDNPER               | 2       | 13S globulin seed storage protein 2-like | XP_021752668.1    |
| 50                        | SANEPSIRIQ               | 3       | 13S globulin seed storage protein 2-like | XP_021752668.1    |
| 51                        | GGQEEMGQNILSGFDKQ        | 1       | 13S globulin seed storage protein 2-like | XP_021752668.1    |
| 52                        | GQSPFLPSGQSSPQHSLRLQ     | 2       | 13S globulin seed storage protein 2-like | XP_021752668.1    |
| 53                        | GLLLPHYNNAP              | 1       | 13S globulin seed storage protein 2-like | XP_021752668.1    |
| 54                        | LTNINSNKLPIIN            | 1       | 13S globulin seed storage protein 2-like | XP_021752668.1    |
| 55                        | NDNAMSSPLAGRIS           | 6       | 13S globulin seed storage protein 2-like | XP_021752668.1    |
| 56                        | EVEDTISKIQGE             | 4       | 13S globulin seed storage protein 2-like | XP_021752668.1    |
| 57                        | DDELROGQL                | 1       | legumin A-like                           | XP_021770181.1    |

|     |                         |    |                                            |                |
|-----|-------------------------|----|--------------------------------------------|----------------|
| 58  | GRIQIVNAQGNVFDDELRL     | 1  | legumin A-like                             | XP_021770181.1 |
| 59  | GRIQIVNAQGNVFDDELRLQG   | 1  | legumin A-like                             | XP_021770181.1 |
| 60  | GVSEDIAEKLQAK           | 3  | legumin A-like                             | XP_021770181.1 |
| 61  | GVSEDIAEKLQAKQDERGNIV   | 4  | legumin A-like                             | XP_021770181.1 |
| 62  | IQIVNAQGNVFDDELRLQG     | 1  | legumin A-like                             | XP_021770181.1 |
| 63  | IVNAQGNVFDDELRL         | 5  | legumin A-like                             | XP_021770181.1 |
| 64  | IVNAQGNVFDDELRLQG       | 8  | legumin A-like                             | XP_021770181.1 |
| 65  | NIDDPKADVYSPEAGRLT      | 2  | legumin A-like                             | XP_021770181.1 |
| 66  | RNAIMAPHYN              | 3  | legumin A-like                             | XP_021770181.1 |
| 67  | SAEKGVLRYNA             | 1  | legumin A-like                             | XP_021770181.1 |
| 68  | SGLDTKSVAQS             | 1  | legumin A-like                             | XP_021770181.1 |
| 69  | YRNAIMAPHYN             | 16 | legumin A-like                             | XP_021770181.1 |
| 70  | GRIQIVNAQGNVFDDELRLQGQL | 1  | legumin A-like                             | XP_021770181.1 |
| 71  | LFRPENQGR               | 1  | legumin A-like                             | XP_021770181.1 |
| 72  | VQEGHLHVIKPPSSR         | 2  | legumin A-like                             | XP_021770181.1 |
| 73  | RTSAIRAMP               | 1  | legumin A-like                             | XP_021770181.1 |
| 74  | AMPAGVAHWAYNSGNEP       | 1  | legumin A-like                             | XP_021770181.1 |
| 75  | HANQLDKDYPKRF           | 1  | legumin A-like                             | XP_021770181.1 |
| 76  | QAEQDERGNIV             | 1  | legumin A-like                             | XP_021768828.1 |
| 77  | TALEPTNRIQ              | 1  | legumin A-like                             | XP_021768828.1 |
| 78  | AMPAGVAHWAYNTGNEP       | 1  | legumin A-like                             | XP_021768828.1 |
| 79  | NIDEPKADVYSPEAGRLT      | 1  | legumin A-like                             | XP_021768828.1 |
| 80  | GVSEDIAEKLQAEQDERGNIV   | 1  | legumin A-like                             | XP_021768828.1 |
| 81  | EEEESSGKGRPYV           | 2  | vicilin-like antimicrobial peptides 2-2    | XP_021764389.1 |
| 82  | EEESSGKGRPYV            | 1  | vicilin-like antimicrobial peptides 2-2    | XP_021764389.1 |
| 83  | INPVSNIKGFE             | 5  | vicilin-like antimicrobial peptides 2-2    | XP_021764389.1 |
| 84  | SQQREGAIKASEEQIR        | 4  | vicilin-like antimicrobial peptides 2-2    | XP_021764389.1 |
| 85  | VAFANITQGSMTPTYYN       | 1  | vicilin-like antimicrobial peptides 2-2    | XP_021764389.1 |
| 86  | VAFANITQGSMTPTYYNSR     | 1  | vicilin-like antimicrobial peptides 2-2    | XP_021764389.1 |
| 87  | VKLINPVSNIKG            | 1  | vicilin-like antimicrobial peptides 2-2    | XP_021764389.1 |
| 88  | FANITQGSMTPTYYNSR       | 1  | vicilin-like antimicrobial peptides 2-2    | XP_021764389.1 |
| 89  | FKTSEDSLK               | 1  | vicilin-like antimicrobial peptides 2-2    | XP_021764389.1 |
| 90  | AENNHKFPLAQOR           | 2  | vicilin-like antimicrobial peptides 2-2    | XP_021764389.1 |
| 91  | LINPVSNIKGFE            | 1  | vicilin-like antimicrobial peptides 2-2    | XP_021764389.1 |
| 92  | SQQREGAIKASE            | 1  | vicilin-like antimicrobial peptides 2-2    | XP_021764389.1 |
| 93  | VAFANITQGSMTPT          | 1  | vicilin-like antimicrobial peptides 2-2    | XP_021764389.1 |
| 94  | VAFANITQGSMTPT          | 1  | vicilin-like antimicrobial peptides 2-2    | XP_021764389.1 |
| 95  | VSFANITQGSMTPT          | 1  | vicilin-like antimicrobial peptides 2-1    | XP_021762713.1 |
| 96  | VSFANITQGSMTPTYYNS      | 1  | vicilin-like antimicrobial peptides 2-1    | XP_021762713.1 |
| 97  | VSFANITQGSMTPTYYNSR     | 3  | vicilin-like antimicrobial peptides 2-1    | XP_021762713.1 |
| 98  | VSTPGVLPVASGGIHV        | 1  | phosphate carboxylase/oxygenase large subu | YP_009380136.1 |
| 99  | VSTPGVLPVASGGIHVW       | 1  | phosphate carboxylase/oxygenase large subu | YP_009380136.1 |
| 100 | RVQEGDVIGSPAGVVQWT      | 1  | 13S globulin seed storage protein 1-like   | XP_021752233.1 |
| 101 | DESGPSIVHRKC            | 1  | actin-1                                    | XP_021749538.1 |
| 102 | SYELPDGQVITIGAER        | 1  | actin-1                                    | XP_021749538.1 |
| 103 | HTGPGILSMANAGPNTNGSQF   | 2  | peptidyl-prolyl cis-trans isomerase 1      | XP_021775867.1 |
| 104 | NVINGGSHAGNKLA          | 1  | enolase                                    | XP_021743148.1 |
| 105 | VDLEPTVIDEVRTGT         | 1  | tubulin alpha-3 chain                      | XP_021714947.1 |
| 106 | AGQKTKDVGTIESK          | 1  | oleosin 18.2 kDa-like                      | XP_021732650.1 |
| 107 | SVIGAIGSTYEHAK          | 2  | ryogenesis abundant protein ECP63-like iso | XP_021737795.1 |
| 108 | ERLLGAALGSALTAADV       | 9  | uncharacterized protein LOC110711964       | XP_021746098.1 |

#### Stomach contents at 1.0 h

| No. | Sequence             | Spectra | Quinoa Protein (Unused Score $\geq 2.0$ ) | Protein Accession |
|-----|----------------------|---------|-------------------------------------------|-------------------|
| 1   | AVVKQAGEEGFE         | 1       | legumin A-like                            | XP_021770181.1    |
| 2   | IDTSNHANQLDK         | 1       | legumin A-like                            | XP_021770181.1    |
| 3   | IDTSNHANQLDKDYPKRF   | 1       | legumin A-like                            | XP_021770181.1    |
| 4   | IVNAQGNVFDDELRLQG    | 1       | legumin A-like                            | XP_021770181.1    |
| 5   | IVNAQGNVFDDELRLQGQL  | 1       | legumin A-like                            | XP_021770181.1    |
| 6   | NIDDPKADVYSPEAGRLT   | 2       | legumin A-like                            | XP_021770181.1    |
| 7   | NIDDPKADVYSPEAGRLTTL | 1       | legumin A-like                            | XP_021770181.1    |
| 8   | SAEKGVLRY            | 1       | legumin A-like                            | XP_021770181.1    |
| 9   | SAEKGVLRYN           | 1       | legumin A-like                            | XP_021770181.1    |

|    |                     |   |                                             |                |
|----|---------------------|---|---------------------------------------------|----------------|
| 10 | SAEKGVLRYNAIM       | 2 | legumin A-like                              | XP_021770181.1 |
| 11 | SGLDTKSVAQS         | 1 | legumin A-like                              | XP_021770181.1 |
| 12 | SGLDTKSVAQSF        | 3 | legumin A-like                              | XP_021770181.1 |
| 13 | SPEAGRLTTLNS        | 1 | legumin A-like                              | XP_021770181.1 |
| 14 | SPEAGRLTTLNSFN      | 1 | legumin A-like                              | XP_021770181.1 |
| 15 | TALEPTHRIQ          | 1 | legumin A-like                              | XP_021770181.1 |
| 16 | SNLRLSAEKG          | 1 | legumin A-like                              | XP_021770181.1 |
| 17 | YRNAIMAPHYN         | 1 | legumin A-like                              | XP_021770181.1 |
| 18 | HANQLDKDYPKRF       | 1 | legumin A-like                              | XP_021770181.1 |
| 19 | FTVSVKAGSNGFE       | 1 | 11S globulin seed storage protein 2-like    | XP_021768838.1 |
| 20 | FTVSVKAGSNGFEY      | 2 | 11S globulin seed storage protein 2-like    | XP_021768838.1 |
| 21 | ILSPGSEQDYDDER      | 1 | 11S globulin seed storage protein 2-like    | XP_021768838.1 |
| 22 | IQVVGNNGESVMDDRVNEG | 2 | 11S globulin seed storage protein 2-like    | XP_021768838.1 |
| 23 | PNTIYSPHW           | 1 | 11S globulin seed storage protein 2-like    | XP_021768838.1 |
| 24 | VSFKTTSPMKSPMVGY    | 1 | 11S globulin seed storage protein 2-like    | XP_021768838.1 |
| 25 | VTVQQNSLSLPNFHP     | 1 | 11S globulin seed storage protein 2-like    | XP_021768838.1 |
| 26 | VVGNNGESVMDDRVNEG   | 1 | 11S globulin seed storage protein 2-like    | XP_021768838.1 |
| 27 | VVGNNGESVMDDRVNEGEM | 1 | 11S globulin seed storage protein 2-like    | XP_021768838.1 |
| 28 | VTVQQNSLSLPNFHPF    | 1 | 11S globulin seed storage protein 2-like    | XP_021768838.1 |
| 29 | LLTNDNAMSSPLAGRIS   | 4 | 13S globulin seed storage protein 2-like    | XP_021752668.1 |
| 30 | LTNDNAMSSPLAGRIS    | 2 | 13S globulin seed storage protein 2-like    | XP_021752668.1 |
| 31 | VALLTNDNAMSSPLAGRIS | 1 | 13S globulin seed storage protein 2-like    | XP_021752668.1 |
| 32 | VWDPKEQQE           | 1 | 13S globulin seed storage protein 2-like    | XP_021752668.1 |
| 33 | YDTNNFQNQLDDNLR     | 3 | 13S globulin seed storage protein 2-like    | XP_021752668.1 |
| 34 | EEEESSGKGRPY        | 1 | vicilin-like antimicrobial peptides 2-1     | XP_021762713.1 |
| 35 | LINPVSNIKFE         | 1 | vicilin-like antimicrobial peptides 2-1     | XP_021762713.1 |
| 36 | NIERGHVM            | 1 | vicilin-like antimicrobial peptides 2-1     | XP_021762713.1 |
| 37 | EEEESSGKGRPYV       | 1 | vicilin-like antimicrobial peptides 2-1     | XP_021762713.1 |
| 38 | LYYTPEYETQ          | 3 | phosphate carboxylase/oxygenase large subu  | YP_009380136.1 |
| 39 | AGVKDYK             | 1 | phosphate carboxylase/oxygenase large subu  | YP_009380136.1 |
| 40 | TFQGPPHGIQVERD      | 1 | phosphate carboxylase/oxygenase large subu  | YP_009380136.1 |
| 41 | LRVAPEEHPVL         | 1 | actin-66-like                               | XP_021716156.1 |
| 42 | NIIPSSTGAACKAVGKVL  | 1 | PROTEIN: glyceraldehyde-3-phosphate deh     | XP_021736301.1 |
| 43 | ELIDSPNNKGWKP       | 1 | ankyrin-3-like                              | XP_021744366.1 |
| 44 | IIANDQGNRTTPSY      | 2 | heat shock cognate 70 kDa protein 2         | XP_021714917.1 |
| 45 | VII MNHPGQIGNGY     | 1 | elongation factor 1-alpha                   | XP_021744217.1 |
| 46 | GADAAGLLLRE         | 1 | r of RNA polymerase II transcription subuni | XP_021726416.1 |
| 47 | KYDEIDAAPER         | 1 | elongation factor TuB, chloroplastic-like   | XP_021733533.1 |
| 48 | IQQATGGTHATQQSS     | 1 | oleosin 1-like                              | XP_021721762.1 |
| 49 | ETTENESANEGYR       | 1 | PsbA (chloroplast)                          | YP_009380110.1 |
| 50 | RVQEGDVIGSPAGVAQ    | 1 | 13S globulin seed storage protein 1-like    | XP_021721911.1 |
| 51 | LGANVGSAQGPTGLGK    | 1 | PsbC (chloroplast)                          | YP_009380126.1 |
| 52 | TAENFSNATGEQGYPGGK  | 1 | rophyll a-b binding protein CP24, chloropla | XP_021751200.1 |
| 53 | FVQQATGGTHATQQSS    | 1 | oleosin 1-like                              | XP_021752156.1 |

#### Stomach contents at 2.0 h

| No. | Sequence           | Spectra | Quinoa Protein (Unused Score $\geq 2.0$ )   | Protein Accession |
|-----|--------------------|---------|---------------------------------------------|-------------------|
| 1   | LRVAPEEHPVL        | 3       | actin-11                                    | XP_021744491.1    |
| 2   | VGDEAQSKRGIL       | 1       | actin-11                                    | XP_021744491.1    |
| 3   | VGDEAQSKRGILTLKY   | 1       | actin-11                                    | XP_021744491.1    |
| 4   | RDLLAGRDLTDY       | 1       | actin-11                                    | XP_021744491.1    |
| 5   | LYYTPEYETQ         | 2       | phosphate carboxylase/oxygenase large subu  | YP_009380136.1    |
| 6   | AGVKDYK            | 5       | phosphate carboxylase/oxygenase large subu  | YP_009380136.1    |
| 7   | TFQGPPHGIQVERD     | 1       | phosphate carboxylase/oxygenase large subu  | YP_009380136.1    |
| 8   | IIANDQGNRTTPSY     | 3       | heat shock cognate 70 kDa protein 2         | XP_021714917.1    |
| 9   | TKMKEIAE           | 1       | heat shock cognate 70 kDa protein 2         | XP_021714917.1    |
| 10  | TGVLKPGMVVTF       | 1       | elongation factor 1-alpha-like              | XP_021715816.1    |
| 11  | ASKSNGKRSNVEAI     | 3       | guanylate-binding protein 2-like            | XP_021722291.1    |
| 12  | HVLTSSILNAVRK      | 1       | putative zinc transporter At3g08650         | XP_021723322.1    |
| 13  | RIGTGLFIATF        | 1       | protein NRT1/ PTR FAMILY 4.3-like           | XP_021713499.1    |
| 14  | SPGYDGR            | 1       | phosphate carboxylase small chain 1, chloro | XP_021755123.1    |
| 15  | LENVIRDAVTY        | 2       | histone H4                                  | XP_021713480.1    |
| 16  | NVINGGSHAGNKLAMQEF | 1       | enolase                                     | XP_021743148.1    |

| 17                                                                                       | ETTENESANEGYR     | 3       | PsbA (chloroplast)                        | YP_009380110.1    |
|------------------------------------------------------------------------------------------|-------------------|---------|-------------------------------------------|-------------------|
| <b>Small intestine contents at 0.5 h</b>                                                 |                   |         |                                           |                   |
| No.                                                                                      | Sequence          | Spectra | Quinoa Protein (Unused Score $\geq 2.0$ ) | Protein Accession |
| 1                                                                                        | LTNINSNKLPIILNYL  | 1       | 13S globulin seed storage protein 2-like  | XP_021752668.1    |
| 2                                                                                        | SETTLFRPENQG      | 1       | legumin A-like                            | XP_021768828.1    |
| 3                                                                                        | SKQKISSLPVE       | 1       | haracterized protein LOC110736894 isoform | XP_021772925.1    |
| 4                                                                                        | GKSLEQVLEIT       | 1       | hexokinase-2-like                         | XP_021749832.1    |
| <b>Small intestine contents at 1.0 h</b>                                                 |                   |         |                                           |                   |
| No.                                                                                      | Sequence          | Spectra | Quinoa Protein (Unused Score $\geq 2.0$ ) | Protein Accession |
| 1                                                                                        | YDTNNFQNQLDDNLRSF | 1       | 13S globulin seed storage protein 2-like  | XP_021752668.1    |
| 1                                                                                        | DTNNFQNQLDDNLRSF  | 1       | 13S globulin seed storage protein 2-like  | XP_021752668.1    |
| 2                                                                                        | AVVKQAGEEGFEW     | 1       | legumin A-like                            | XP_021768828.1    |
| * No peptide was identified in small intestine contents at 2.0 h and the colon contents. |                   |         |                                           |                   |
